# Supplementary material
Source: PubMed Central journal article supplement (PMC2892387)
Supplement: NIHMS213375-supplement-Supp1.pdf [file NIHMS213375-supplement-Supp1.pdf]

**ONLINE SUPPLEMENT**

**EXTRACELLULAR 2',3'-cAMP IS A POTENT INHIBITOR OF PREGLOMERULAR  
VASCULAR SMOOTH MUSCLE CELL AND MESANGIAL CELL GROWTH**

Edwin K. Jackson, Jin Ren, Delbert G. Gillespie and Raghendra K. Dubey

Department Of Pharmacology and Chemical Biology (EKJ, JR, DGG)  
University of Pittsburgh School of Medicine; Pittsburgh, PA  
and

Department of Obstetrics and Gynecology (RKD); Zurich, Switzerland

Short Title: 2',3'-cAMP Inhibits Cell Growth

Address for Correspondence:

Edwin K. Jackson, PhD

Department of Pharmacology and Chemical Biology

University of Pittsburgh School of Medicine

100 Technology Drive, Suite 450

Pittsburgh, PA 15219

Tel: (412) 648-1505; Fax: (412) 648-1837; E-mail: [edj@pitt.edu](mailto:edj@pitt.edu)

Figure S1

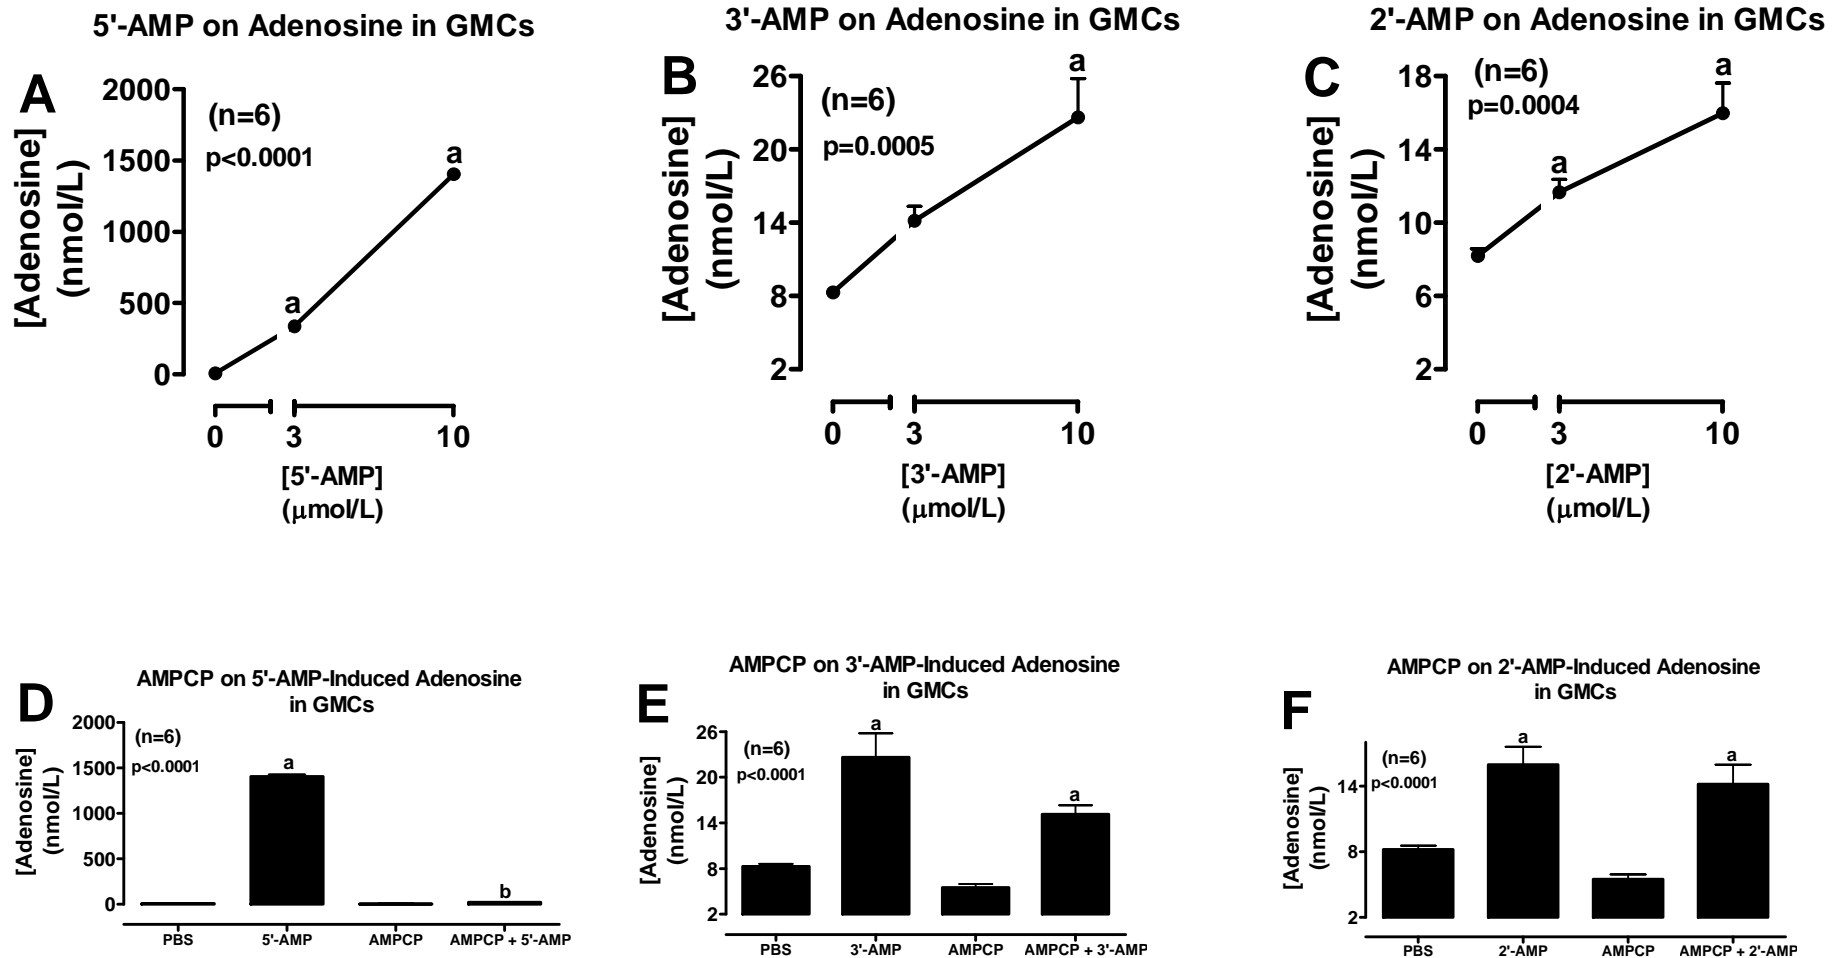

Figure S1. Line graphs show the concentration-dependent effects of 5'-AMP (A), 3'-AMP (B) and 2'-AMP (C) on extracellular levels of adenosine in GMCs. Bar graphs show the effects of AMPCP (1 mmol/L) on extracellular adenosine levels derived from 5'-AMP (D), 3'-AMP (E) and 2'-AMP (F). Values represent means  $\pm$  SEM for the indicated number of experiments (n). <sup>a</sup> $p < 0.05$ , compared with basal (0 or PBS) value; <sup>b</sup> $p < 0.05$ , compared with the corresponding AMP in the absence of inhibitor. P-values in panels are from 1-factor analysis of variance.

Figure S2

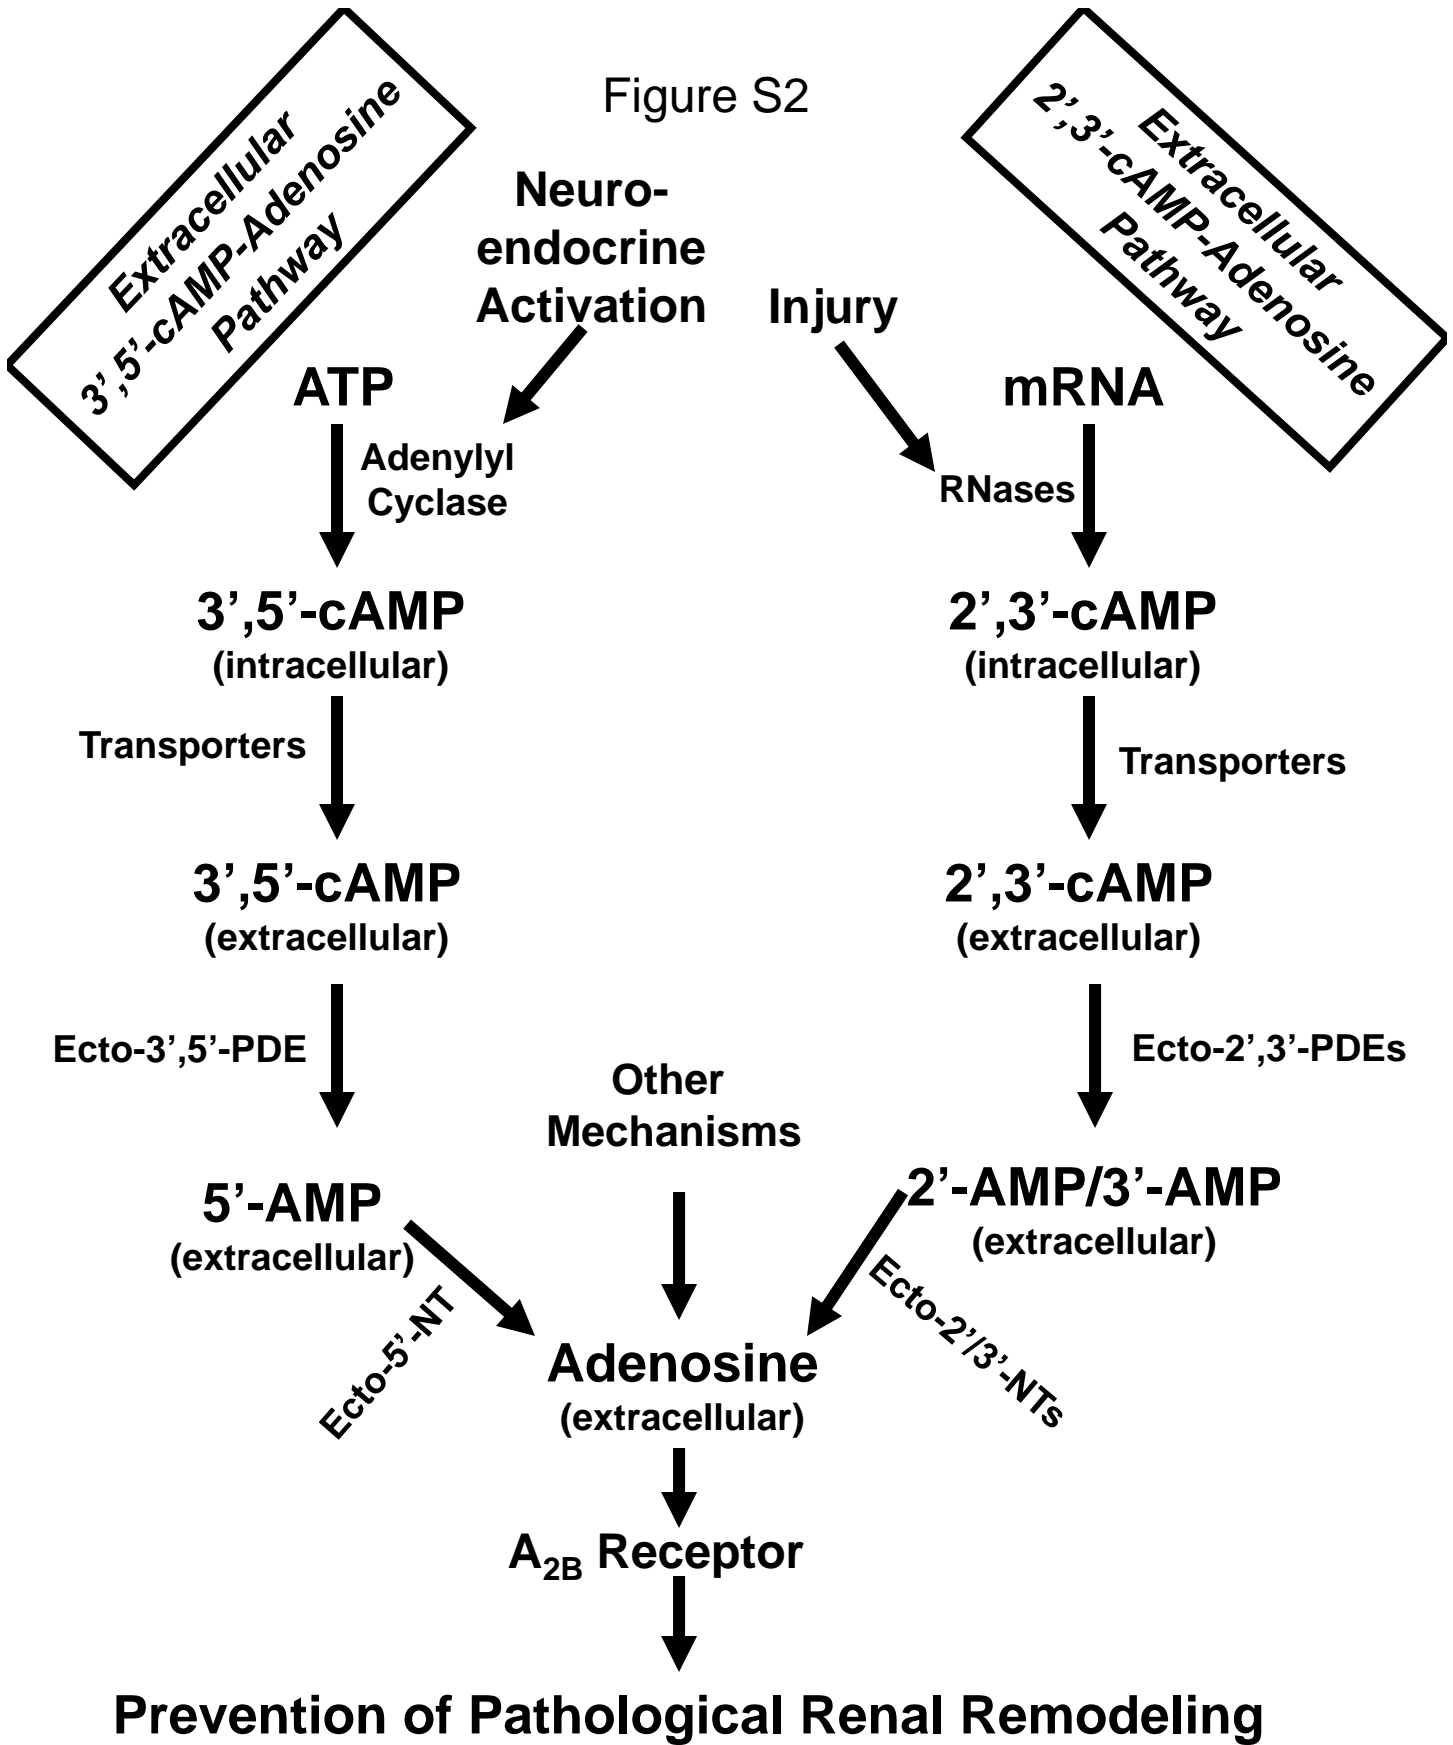

**Figure S2:** Schematic diagram of the extracellular 3',5'-cAMP-adenosine and 2',3'-cAMP-adenosine pathways. PDE, phosphodiesterase; NT, nucleotidase.
